# Supplementary material for: Functional Analysis of Conserved Motifs in the Mechanosensitive Channel Homolog MscS-Like2 from Arabidopsis thaliana
Source: PubMed Central journal article supplement (PMC3386975; doi:10.1371/journal.pone.0040336), 2012-06-29
Supplement: pone.0040336.s001.pdf [file pone.0040336.s001.pdf]

**Table S1. Oligonucleotides used in this work**

| <b>Oligo name</b> | <b>Gene</b>  | <b>Use</b>                | <b>Base Pair Sequence</b>                          |
|-------------------|--------------|---------------------------|----------------------------------------------------|
| P297A             | <i>MSL2</i>  | site directed mutagenesis | CATGCAACCCGGGCATTTGTTTTGAATGAGTGGATTG              |
| P297A-GC          | <i>MSL2</i>  | site directed mutagenesis | GAATCCACTCATTCAAACAAATGCCCGGGTTGCATG               |
| V273S             | <i>MSL2</i>  | site directed mutagenesis | GCTGGAGGTCTTGGGACAAGTTTGATTACTCTTGCTGGCCG          |
| V273S-GC          | <i>MSL2</i>  | site directed mutagenesis | CGGCCAGCAAGAGTAATCAAACCTTGCCCAAGACCTCCAGC          |
| L277S             | <i>MSL2</i>  | site directed mutagenesis | GGTCTTGGGACAGTTTTGATTACTAGTGCTGGCCGAGAG            |
| L277S-GC          | <i>MSL2</i>  | site directed mutagenesis | CTCTCGGCCAGCACTAGTAATCAAACCTTGCCCAAGACC            |
| VL2S              | <i>MSL2</i>  | site directed mutagenesis | GGTCTTGGGACAAGTTTGATTACTAGTGCTGGCCGAGAG            |
| VL2S-GC           | <i>MSL2</i>  | site directed mutagenesis | CTCTCGGCCAGCACTAGTAATCAAACCTTGCCCAAGACC            |
| PNN2A             | <i>MSL2</i>  | site directed mutagenesis | CACATCGCAGCCCATAAGTTCACAGTTAATGTCGTGAGAGCTCTTACTC  |
| PNN2A-GC          | <i>MSL2</i>  | site directed mutagenesis | GAGTAAGAGCTCTCACGACATTAACCTGTGAACTTATGGGCTGCGATGTG |
| Actin.F2          | <i>ACTIN</i> | RT-PCR                    | TACGCCAGTGGTCGTACAAC                               |
| Actin.R2          | <i>ACTIN</i> | RT-PCR                    | TGTGAGACACACCATCACCAGA                             |
| 10490.F3          | <i>MSL2</i>  | RT-PCR                    | GAGAACAACCTCCAATCGAAGAAGAGATAC                     |
| 10490.R2          | <i>MSL2</i>  | RT-PCR                    | CGGCTCGGTTGAAGCACC                                 |
| GFP_UP            | <i>GFP</i>   | RT-PCR                    | CTCGCCGGACACGCTGAACTTGT                            |
